# Supplementary material for: Hepatic CYP3A4 Enzyme Compensatively Maintains Endogenous Geranylgeranoic Acid Levels in MAOB-Knockout Human Hepatoma Cells
Source: MDPI journal article supplement (doi:10.3390/metabo12020140), 2022-02-03
Supplement: s1 [file s1]

**Hepatic CYP3A4 enzyme compensatively maintains endogenous geranylgeranoic acid levels in *MAOB*-knockout human hepatoma cells.**

**Yuki Tabata<sup>1,2</sup>, Yoshihiro Shidoji<sup>2\*</sup>**

1. Department of Nutrition, Kiryu University, Gunma 379-2392, Japan; tabata-yu@kiryu-u.ac.jp (Y.T.), ORCID: 0000-0002-1117-5215

2. Molecular and Cellular Biology, Graduate School of Human Health Science, University of Nagasaki, Nagasaki 851-2195, Japan; shidoji@sun.ac.jp (Y.S.), ORCID: 0000-0002-2136-6752.

\*Correspondence: shidoji@sun.ac.jp

**Supplementary Table S1.** The nucleotide sequences of each primer used for real-time RT-qPCR.

| Genes           | Primer | Sequence (5' – 3')       |
|-----------------|--------|--------------------------|
| <i>CYP1A1</i>   | F      | CATCCCCACAGCACAACA       |
|                 | R      | CAGGGGTGAGAAACCGTTCA     |
| <i>CYP1A2</i>   | F      | AGTCCAGGAGCACTATCAGG     |
|                 | R      | CCTGCTCCAAAGATGTCATT     |
| <i>CYP1B1</i>   | F      | GCCACTATCACTGACATCTTCGG  |
|                 | R      | CACGACCTGATCCAATTCTGCC   |
| <i>CYP2A6</i>   | F      | CTCATGAAGATCAGTGAGCGCTAT |
|                 | R      | CTCCCCGTTGCTGAATACCA     |
| <i>CYP2B6</i>   | F      | CCACCCTAACACCCATGACC     |
|                 | R      | CCCAGGTGTACCGTGAAGAC     |
| <i>CYP2D6</i>   | F      | TTCCTGCCTTTCTCAGCAGG     |
|                 | R      | CCAGGAAAGCAAAGACACCA     |
| <i>CYP3A4</i>   | F      | TATTTTGTCTACCATAAGGGCTTT |
|                 | R      | AGCACAGGCTGTTGACCATC     |
| <i>CYP3A5</i>   | F      | GTCTCTCTGTTTCCAAAAGATACC |
|                 | R      | TGAAGAAGTCCTTGCGTGTC     |
| <i>28S rRNA</i> | F      | TTAGTGACGCGCATGAATGG     |
|                 | R      | TGTGGTTTCGCTGGATAGTAGGT  |

F: forward primer, R: reverse primer

CYP, cytochrome P450.

**Supplementary Table S2.** The condition of thermal cyclers for real-time RT-PCR.

|                 | Temperature, Duration | Slope    |
|-----------------|-----------------------|----------|
| Denature        | 95°C, 600 s           | 20°C / s |
| PCR (40 cycles) | 95°C, 15 s            | 20°C / s |
|                 | 60°C, 60 s            | 20°C / s |
| Melting         | 95°C, 0 s             | 20°C / s |
|                 | 57°C, 15 s            | 20°C / s |
|                 | 98°C, 0 s             | -        |
| Cooling         | 40°C, 30 s            | 20°C / s |

**Supplementary Table S3.** The condition of thermal cyclers for real-time RT-PCR of *28S rRNA*.

|                 | Temperature, Duration | Slope     |
|-----------------|-----------------------|-----------|
| Denature        | 95°C, 600 s           | 4.4°C / s |
| PCR (40 cycles) | 95°C, 10 s            | 4.4°C / s |
|                 | 60°C, 10 s            | 2.2°C / s |
|                 | 72°C, 3 s             | 4.4°C / s |
| Melting         | 95°C, 1 s             | 4.4°C / s |
|                 | 65°C, 15 s            | 2.2°C / s |
|                 | 95°C, 1 s             | -         |
| Cooling         | 40°C, 30 s            | 4.4°C / s |

**Supplementary Table S4.** The sequences of each siRNA used for knockdown experiments.

|                 |             | Sequence (5' – 3')    |
|-----------------|-------------|-----------------------|
| <i>siCYP3A4</i> | Sense A     | CCAGAGACCUCAAAUUAUtt  |
|                 | Antisense A | AGUAAUUUGAGGUCUCUGGtt |
|                 | Sense B     | CCAAUGGACUGCAUAAAUtt  |
|                 | Antisense B | UAUUUAUGCAGUCCAUUGGtt |
|                 | Sense C     | CCAACUGUCUCGAUGCAAUtt |
|                 | Antisense C | AUUGCAUCGAGACAGUUGGtt |

CYP, cytochrome P450.

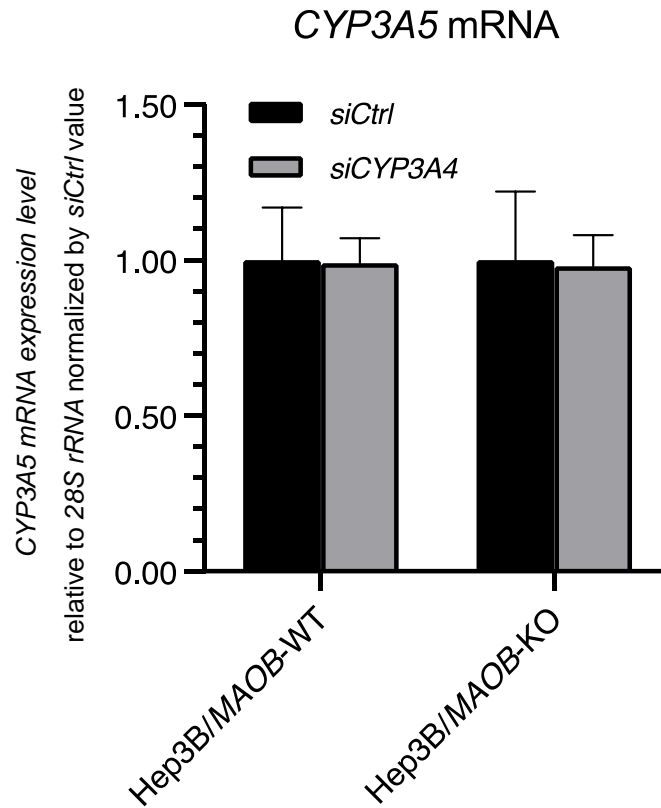

**Supplementary Figure S1.**

The expression levels of *CYP3A5* mRNA in Hep3B/*MAOB*-WT cells and Hep3B/*MAOB*-KO cells treated with *CYP3A4* siRNA for 72 h are shown as relative expression level to *CYP3A5* mRNA in *siCtrl*-treated Hep3B/*MAOB*-WT cells.

Each bar represents the mean  $\pm$  SEM (n = 3).

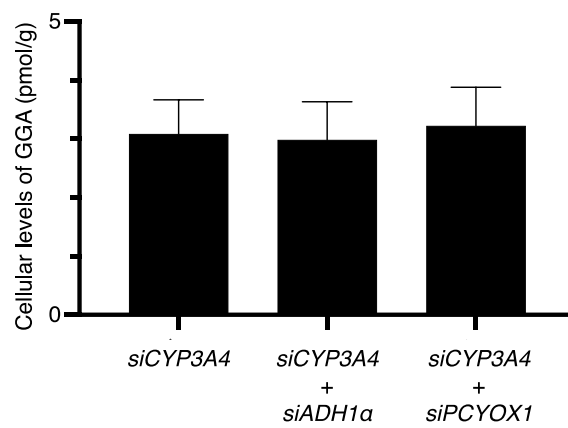

**Supplementary Figure S2.**

Cellular GGA levels in Hep3B/*MAOB*-KO cells treated with *CYP3A4* siRNA and *ADH1α* siRNA or *PCYOX1* siRNA. Each bar represents the mean  $\pm$  SEM ( $n = 3$ ).

(A)

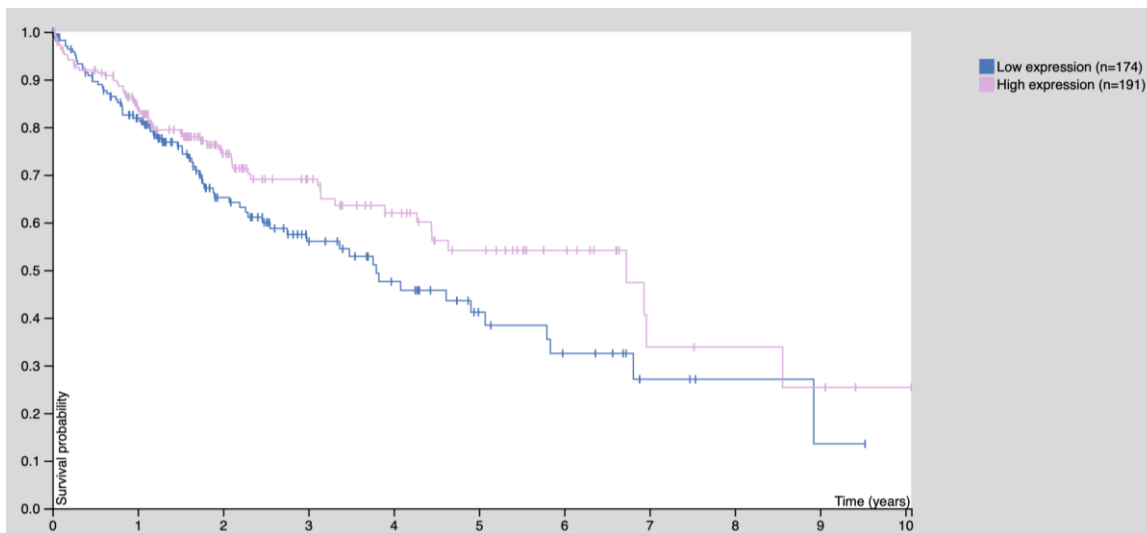

(B)

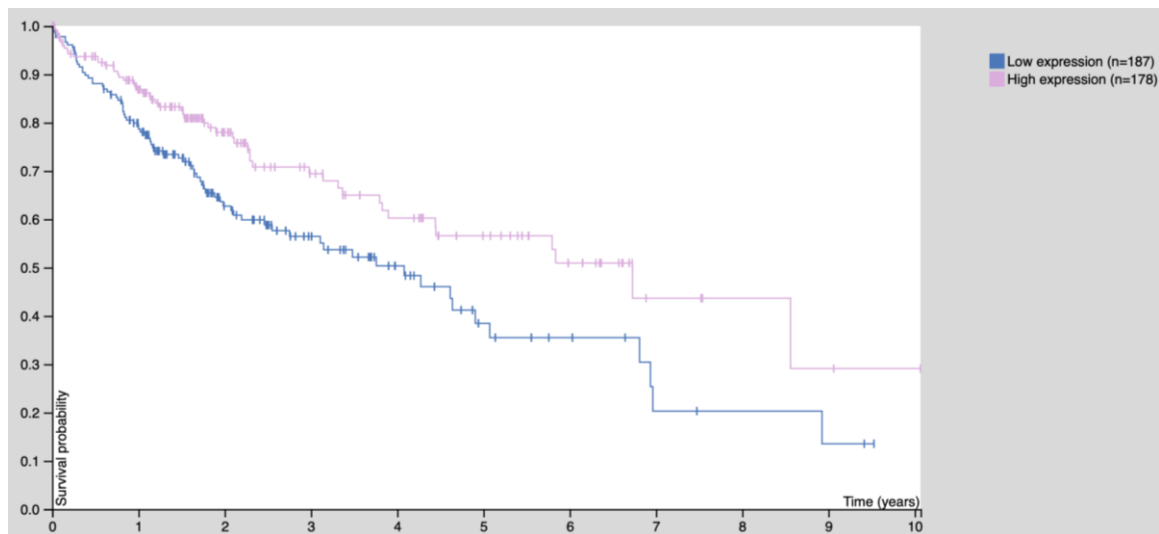

**Supplementary Figure S3.**

**Prognosis of hepatoma patients between the high and low expression groups of the *MAOB* or *CYP3A4* gene shown by Kaplan-Meier plots.**

Image credit: Human Protein Atlas, [www.proteinatlas.org](http://www.proteinatlas.org), ([32] Uhlén M et al, 2015).

Image available at the following URL:

<https://v21.proteinatlas.org/ENSG00000069535-MAOB/pathology/liver+cancer> (A) and

<https://v21.proteinatlas.org/ENSG00000160868-CYP3A4/pathology/liver+cancer> (B).
